# Supplementary material
Source: PubMed Central journal article supplement (PMC3158807)
Supplement: NIHMS314344-supplement-1.pdf [file NIHMS314344-supplement-1.pdf]

## SUPPLEMENTAL MATERIAL

### Detailed Methods

**TTC staining** The mouse heart was cut into 6 1-mm thick slices which were submerged in 1% TTC and incubated at 37°C for 10-15 min. After aspiration of TTC, the slices were fixed in 10% formalin and then images were captured to calculate infarct size and size of area at risk (AAR) as previously reported <sup>1</sup>.

**Hairpin-2 staining** A double stranded DNA fragment with blunt ends was prepared as previously described<sup>2-4</sup>. Polymerase chain reaction (PCR) with Pfu Ultra polymerase was performed with 16.6 µmol/L Texas Red-12-dUTP (Molecular Probes), 16.6 µmol/L dTTP, 50 µmol/L dATP, 50 µmol/L dCTP and 50 µmol/L dGTP. Pfu probe recognizes a form of DNA damage characterized by cleavage of multiple DNA fragments with blunt ends, typically observed in necrotic cell death<sup>5-7</sup>. Heart sections were deparaffinized with xylene, rehydrated in graded alcohol concentrations, briefly washed in water, and then treated with proteinase K (50 g/ml) in PBS for 45 minutes at 37°C. After washing with PBS, a mix of 50 mmol/L Tris-HCl, pH 7.8, 10 mmol/L MgCl<sub>2</sub>, 10 mmol/L DTT, 1 mmol/L ATP, 25 µg/mL BSA, 15% polyethylene glycol (8,000 mol wt, Sigma), 1 µg/mL Texas red-labeled DNA fragment and 250 U/mL DNA T4 ligase (Boehringer Mannheim) was added. Sections were then placed in a humidified box for 16 h. The sections were thoroughly washed in 70°C water and then were observed under a fluorescent microscope immediately after counterstaining with 10 µg/mL 4,6-diamidino-2-phenylindole (DAPI).

**TUNEL staining** The mouse heart was harvested after 24 hours of reperfusion and fixed in 10% formalin. TUNEL staining was carried out and TUNEL positive nuclei were counted as previously reported <sup>8</sup>.

**Immunoblotting** The ischemic myocardium was isolated and homogenized in RIPA buffer. Immunoblotting using phospho-p70 S6 kinase (S6K), total S6K, and p62 primary antibodies was performed as previously described <sup>1</sup>.

### Supplemental References

1. Matsui Y, Takagi H, Qu X, Abdellatif M, Sakoda H, Asano T, Levine B, Sadoshima J. Distinct roles of autophagy in the heart during ischemia and reperfusion: roles of AMP-activated protein kinase and Beclin 1 in mediating autophagy. *Circ Res.* 2007;100:914-922.
2. Didenko VV, Tunstead JR, Hornsby PJ. Biotin-labeled hairpin oligonucleotides: probes to detect double-strand breaks in DNA in apoptotic cells. *Am J Pathol.* 1998;152:897-902.
3. Hsu CP, Oka S, Shao D, Hariharan N, Sadoshima J. Nicotinamide phosphoribosyltransferase regulates cell survival through NAD<sup>+</sup> synthesis in cardiac myocytes. *Circ Res.* 2009;105:481-491.
4. Yamamoto S, Seta K, Morisco C, Vatner SF, Sadoshima J. Chelerythrine rapidly induces apoptosis through generation of reactive oxygen species in cardiac myocytes. *J Mol Cell Cardiol.* 2001;33:1829-1848.
5. Fiordaliso F, Li B, Latini R, Sonnenblick EH, Anversa P, Leri A, Kajstura J. Myocyte death in streptozotocin-induced diabetes in rats is angiotensin II-dependent. *Lab Invest.* 2000;80:513-527.
6. Frustaci A, Chimenti C, Setoguchi M, Guerra S, Corsello S, Crea F, Leri A, Kajstura J, Anversa P, Maseri A. Cell death in acromegalic cardiomyopathy. *Circulation.* 1999;99:1426-1434.
7. Guerra S, Leri A, Wang X, Finato N, Di Loreto C, Beltrami CA, Kajstura J, Anversa P. Myocyte death in the failing human heart is gender dependent. *Circ Res.* 1999;85:856-866.
8. Zhai P, Yamamoto M, Galeotti J, Liu J, Masurekar M, Thaisz J, Irie K, Holle E, Yu X, Kupershmidt S, Roden DM, Wagner T, Yatani A, Vatner DE, Vatner SF, Sadoshima J. Cardiac-specific overexpression of AT1 receptor mutant lacking G alpha q/G alpha i coupling causes hypertrophy and bradycardia in transgenic mice. *J Clin Invest.* 2005;115:3045-3056.

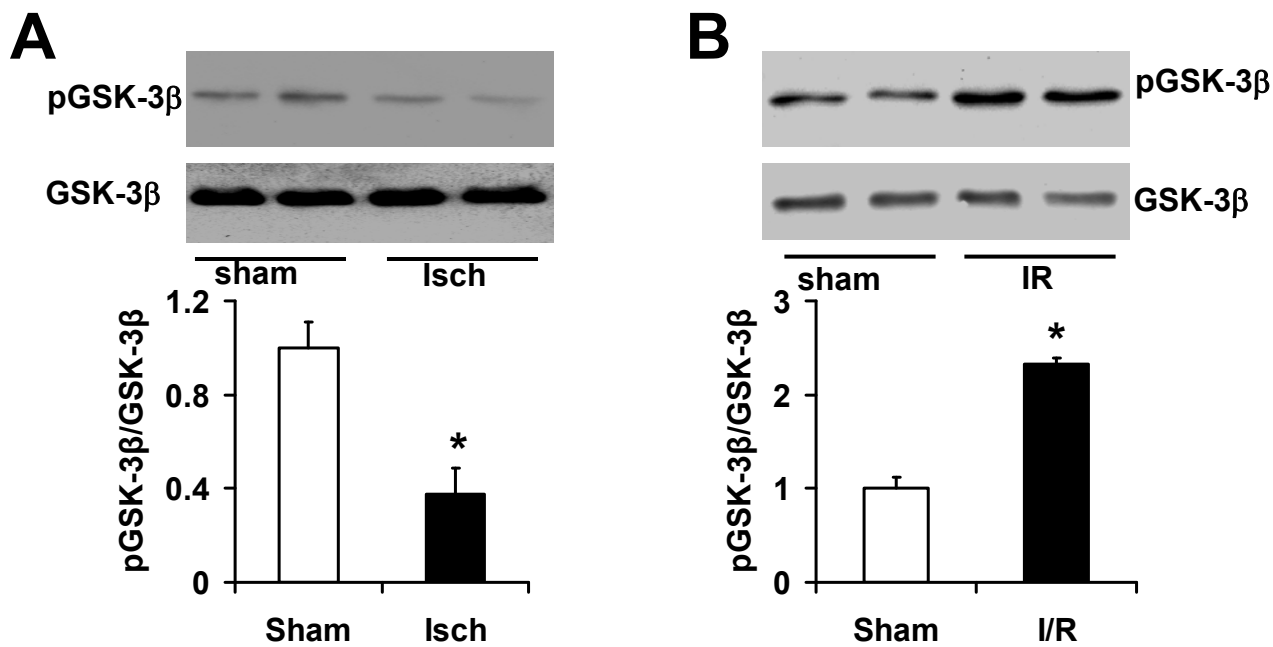

**Online Figure I.** Phosphorylation of GSK-3 $\beta$  after 30 min of ischemia (A) and after 20 min of ischemia and 30 min of reperfusion (B) in C57BL/6J mice. \*P<0.01 vs. respective Sham. Data are mean  $\pm$  SEM.

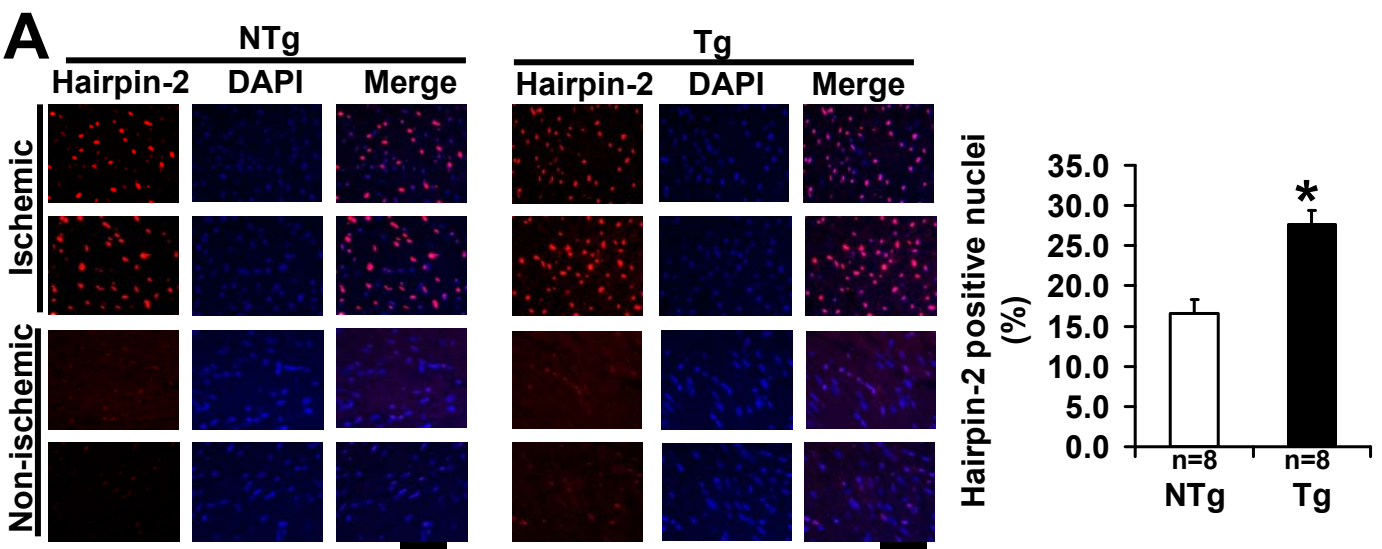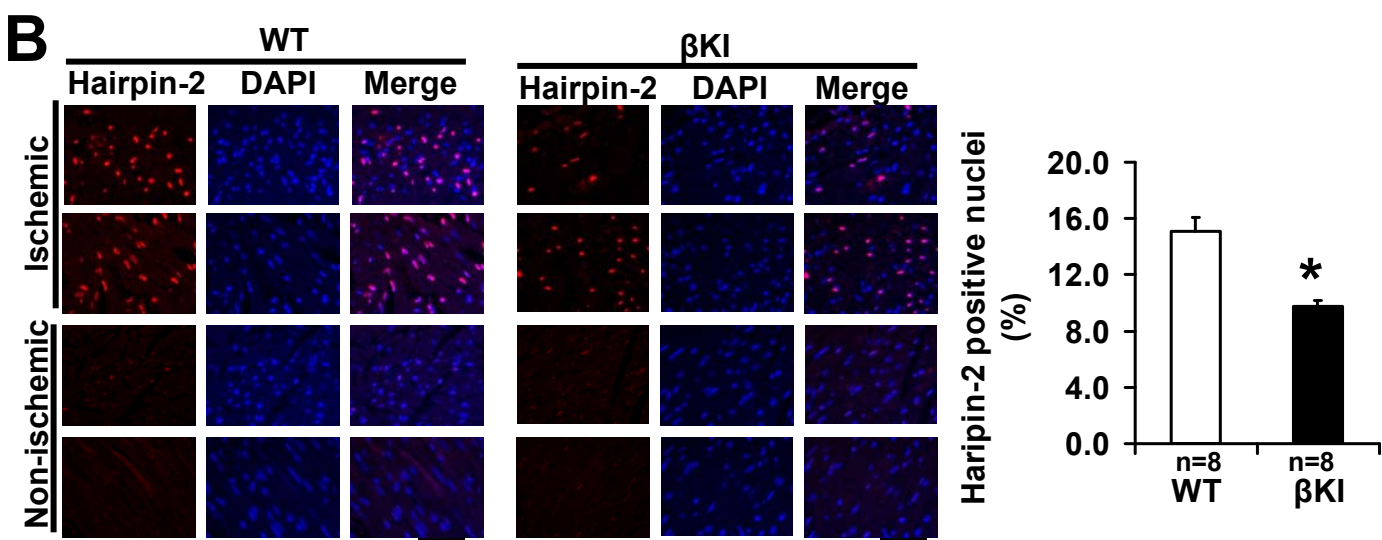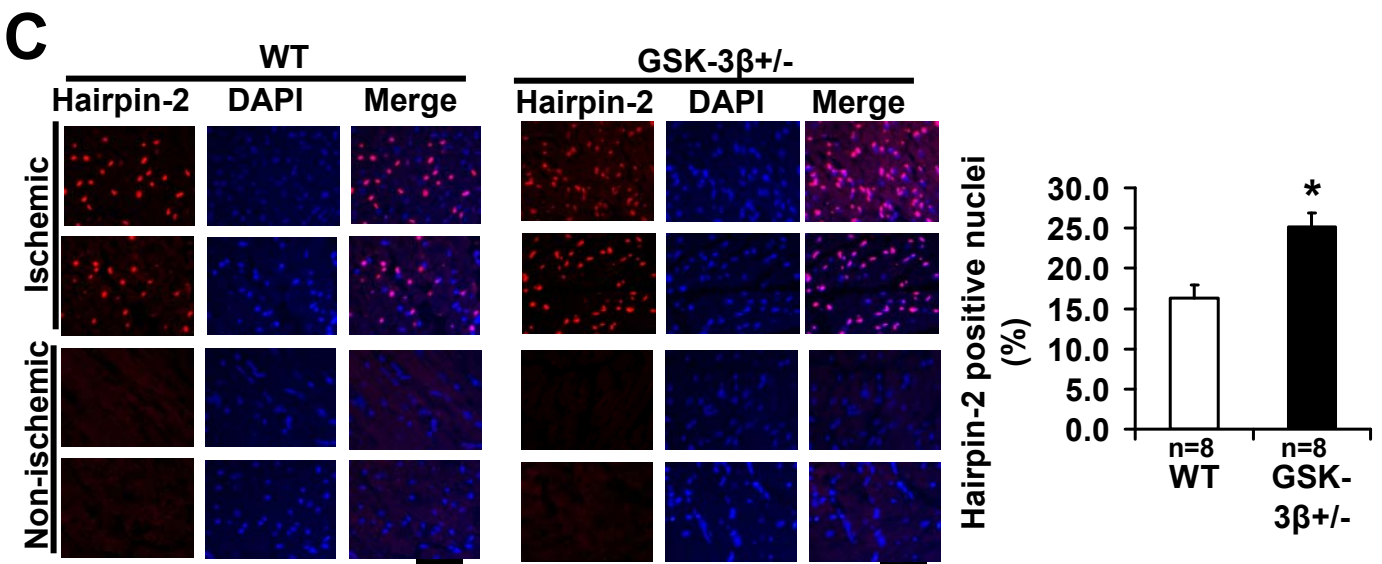

**Online Figure II.** The role of GSK-3 $\beta$  in modulating myocardial injury caused by prolonged ischemia. In A-C, images of Hairpin-2 staining of cardiac tissue sections from animals 2 hours after myocardial ischemia are shown. Scale bar = 100  $\mu$ m. The percentages of Hairpin-2 positive nuclei are shown (bar graphs). Data are mean  $\pm$  SEM. A. Cardiac-specific dominant negative GSK-3 $\beta$  transgenic mice (Tg) and their littermate non-transgenic mice (NTg) were used. \*P<0.01 vs. NTg. B. Constitutively active GSK-3 $\beta$ <sup>S9A</sup> knock-in mice ( $\beta$ KI) and wild type mice (WT) were used. \*P<0.01 vs. WT. C. Heterozygous GSK-3 $\beta$  knock-out mice (GSK-3 $\beta$  +/-) were used. \*P<0.01 vs. WT.

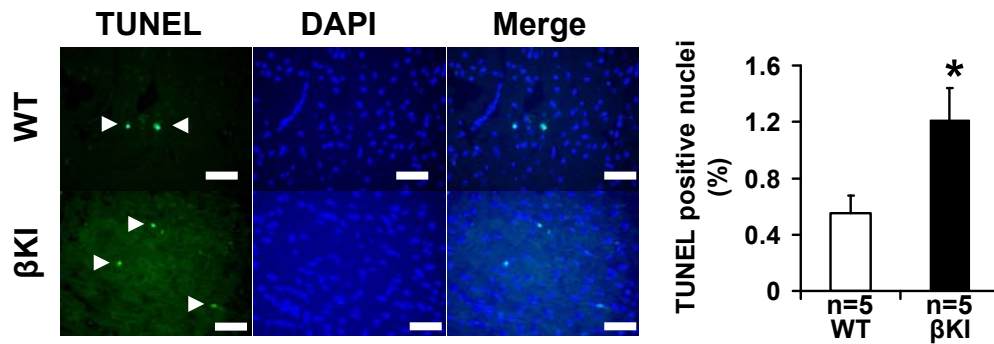

**Online Figure III.** Apoptosis in constitutively active GSK-3 $\beta^{S9A}$  knock-in mice ( $\beta$ KI). Images were taken from TUNEL and DAPI stained cardiac sections. Scale bar = 50  $\mu$ m. The bar graph shows the percentage of TUNEL positive nuclei. Data are mean  $\pm$  SEM. \*P<0.05 vs. WT.

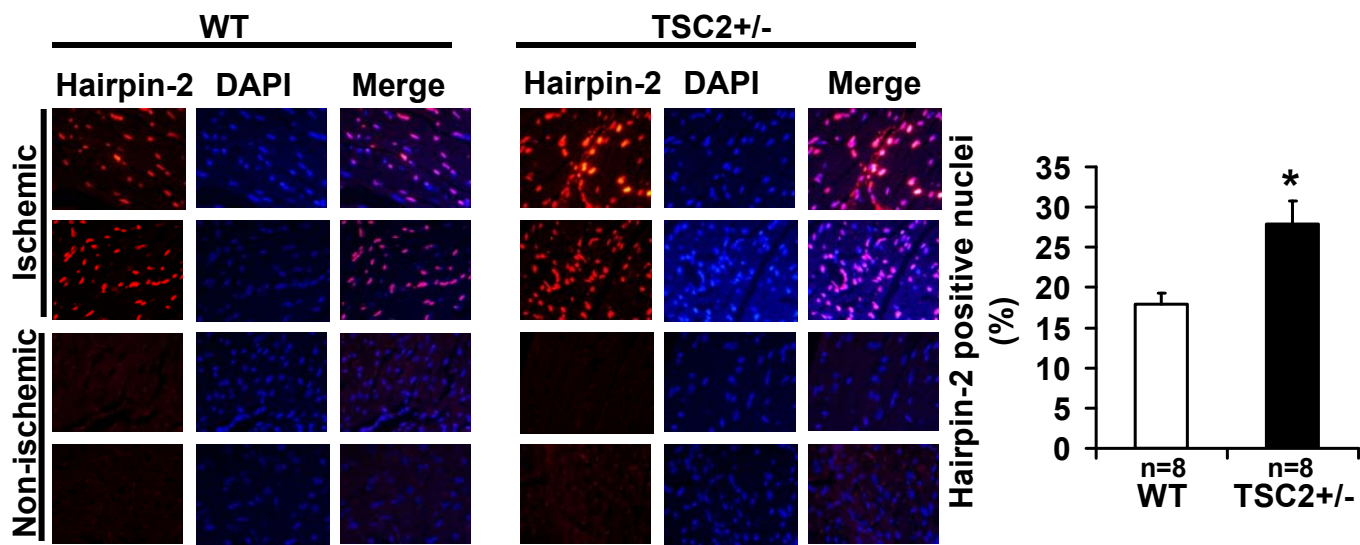

**Online Figure IV.** Myocardial necrosis in heterozygous TSC2 knock-out mice (TSC2+/-) and wild type mice (WT) after 2 hours of ischemia. Images were taken from Hairpin-2 stained cardiac sections. Scale bar = 100  $\mu$ m. The percentages of Hairpin-2 positive nuclei are shown in the bar graph. Data are mean  $\pm$  SEM. \*P<0.01 vs. WT.

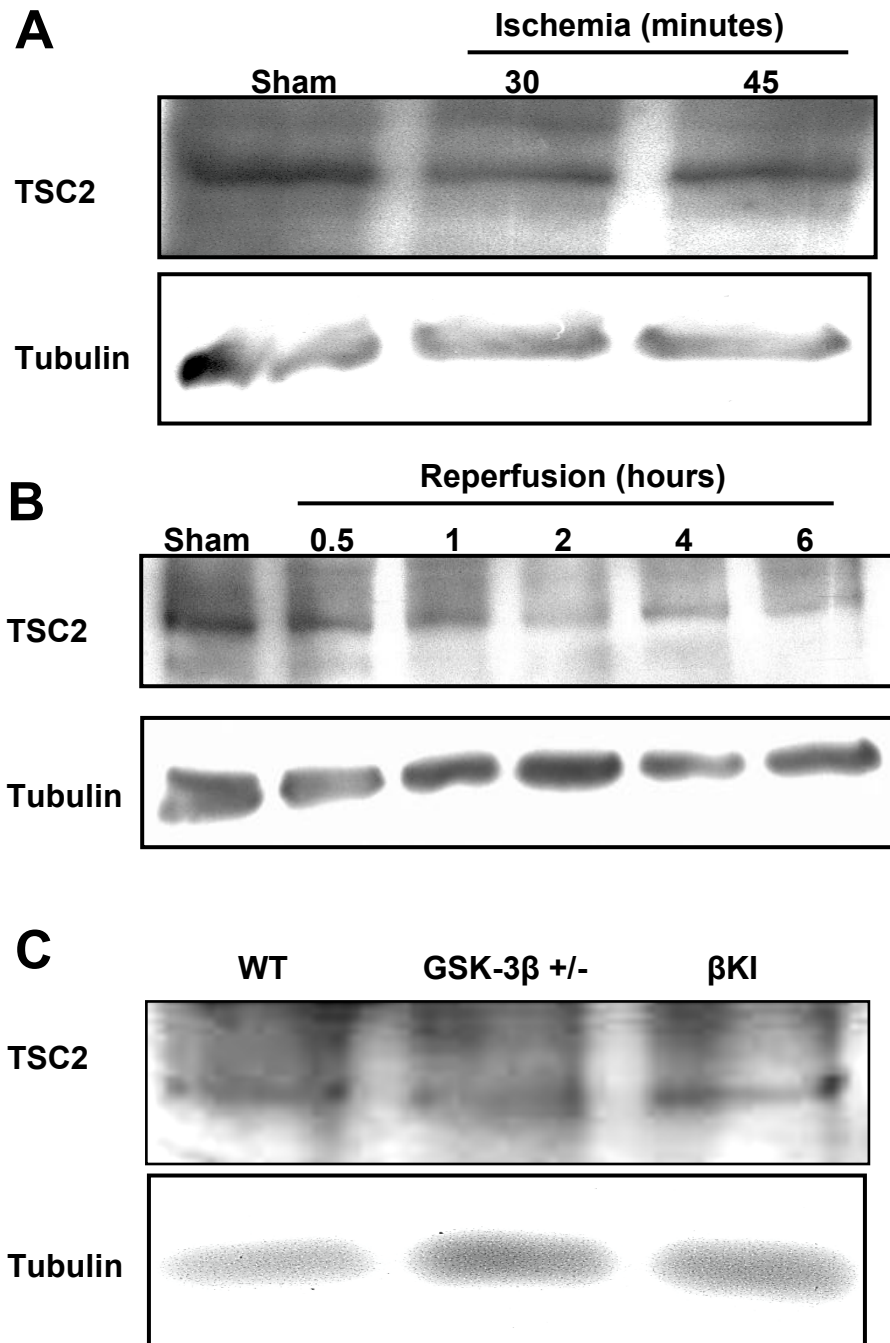

**Online Figure V.** TSC2 expression. A. During ischemia. B. During reperfusion. C. At baseline, in GSK-3 $\beta$  heterozygous knock-out mouse heart (GSK-3 $\beta$  +/-) and constitutively active GSK-3 $\beta$ <sup>S9A</sup> knock-in mouse heart ( $\beta$ KI).
